# Supplementary material
Source: HighWire-hosted journal article supplement (https://bmjopen.bmj.com/content/11/8/e047395)
Supplement: inline-supplementary-material-3 [file inline-supplementary-material-3.pdf]

## MEASURING COMPETENCE IN DOCTORS

## Supplemental Material File 3

## Comprehensive List of All Identified Measures

| Reference Identifier | IM/RM  | Outcome Measure                                                                        | Measure Identifier |
|----------------------|--------|----------------------------------------------------------------------------------------|--------------------|
| P1                   | IM (A) | The Angoff Method (OSCE rating scale)                                                  | M1                 |
| P2                   | IM     | US Medical Licensing Examinations (USMLE)                                              | M2                 |
| P2                   | IM     | Medical College Admission Test (MCAT)                                                  | M3                 |
| P2                   | RM     | Jefferson Scale of Physician Empathy                                                   | M4                 |
| P3                   | RM     | Jefferson Scale of Physician Empathy – Student Version (JSPF-S)                        | M5                 |
| P3                   | IM     | Objective structured clinical examination (OSCE)                                       | M6                 |
| P3                   | IM     | Rating Scales for the Assessment of Empathic Communication in Medical Interviews (REM) | M7                 |
| P4                   | RM     | Questionnaire survey about notions of a 'good doctor' 6 brief questionnaire surveys    | M8                 |
| P5                   | IM (A) | Performance Rating Instrument - A Trainee Intern Rating Form                           | M9                 |
| P6                   | RM     | Twenty Questions (TQ) game performance                                                 | M10                |
| P6                   | IM     | Medical College Admission Test (MCAT) Biological Science Test Score                    | M11                |
| P7                   | RM     | 25-point prior experience and confidence questionnaire                                 | M12                |
| P7                   | IM     | A pre-determined critical event simulation                                             | M13                |
| P8                   | RM     | Vignettes on chronic pain (assessed by treatment outcome)                              | M14                |
| P8                   | IM     | The short Medical Authoritarianism Scale (MA-S)                                        | M15                |
| P9                   | RM     | A video-based situational judgment test (SJT) assessing social competencies            | M16                |
| P10                  | RM     | Performance-based self-esteem (PBSE)                                                   | M17                |
| P10                  | RM     | Oldenburg Burnout Inventory (OLBI)                                                     | M18                |
| P11                  | IM     | Standardised Patient Examination (SPE)                                                 | M19                |
| P11                  | IM     | Opinions about Physicians Interactions with Patients (OPIP)                            | M20                |
| P11                  | IM     | Medical College Admission Test (MCAT) GPA                                              | M21                |
| P12                  | IM     | OSCE combined with a written examination                                               | M22                |
| P13                  | RM     | Anderson's Epistemological Beliefs Questionnaire (EBQ)                                 | M23                |
| P13                  | IM     | SP: Korean Clinical Performance Examination (CPX)                                      | M24                |
| P14                  | IM (A) | The CanMEDS Physician Competency Framework                                             | M25                |
| P15                  | IM     | Written Vignettes                                                                      | M26                |
| P15                  | RM     | Time-pressured Vignette Assessment                                                     | M27                |
| P16                  | IM     | US Medical Licensing Examinations (USMLE)                                              | M28                |
| P17                  | RM     | Group Assessment Performance (GAP) Test                                                | M29                |
| P18                  | IM     | OSCE self-assessment measure on a 6-point Global Rating Scale (GRS)                    | M30                |

|     |        |                                                                                                        |     |
|-----|--------|--------------------------------------------------------------------------------------------------------|-----|
| P19 | RM     | Workload Insight™ Application (Chronometry measure of task)                                            | M31 |
| P19 | IM     | The Secondary Task Method – Venipuncture (Simulated task performance rated using a 16-point checklist) | M32 |
| P20 | RM (A) | A 360-degree Assessment of Competencies                                                                | M33 |
| P21 | RM     | PediatricSim Electronic Game                                                                           | M34 |
| P22 | RM     | The 5-item Doctor-Patient Communication Competency Instrument for Medical Students (SP)                | M35 |
| P23 | RM     | Patient Evaluation of Physician Competence                                                             | M36 |
| P24 | RM     | Diagnostic Competency Framework                                                                        | M37 |
| P25 | IM     | Simulated Patient (SP) with simulated crisis parameters of mortality and morbidity                     | M38 |
| P26 | IM     | 7-point Global Rating Scale (GRS)                                                                      | M39 |
| P26 | RM     | Chronometry                                                                                            | M40 |
| P27 | IM     | Direct Observation of Procedural Skills (DOPS)                                                         | M41 |
| P28 | RM (A) | Qualitative Experiential Knowledge                                                                     | M42 |
| P29 | RM     | 360-degree Assessment                                                                                  | M43 |
| P30 | RM     | The Freiberg Questionnaire to Assess Competencies in Medicine                                          | M44 |
| P31 | RM     | Internal Medicine Standardized Simulation Based Examination (SSBE)                                     | M45 |
| P32 | RM     | The Interpersonal Reactivity Index (IRI)                                                               | M46 |
| P32 | RM     | The Maslach Burnout Inventory                                                                          | M47 |
| P32 | RM     | Medical Outcomes Study Short Form (SF-8)                                                               | M48 |
| P32 | IM     | The Mini-Clinical Evaluation Exercise (mini-CEX)                                                       | M49 |
| P32 | IM     | In-training Examinations (ITE)                                                                         | M50 |
| P33 | IM     | Global Rating Scale (GRS)                                                                              | M51 |
| P33 | RM     | The Test of Self-Conscious Affect, Version 3 (TOSCA-3)                                                 | M52 |
| P34 | RM     | Chronometry                                                                                            | M53 |
| P34 | RM     | Objective Performance Ratings by Independent Assessors of Videographed Procedure                       | M54 |
| P35 | IM     | Procedural Assessment of Clinical Skill (Injection & Suturing)                                         | M55 |
| P35 | RM     | Procedural Skills Confidence Survey                                                                    | M56 |
| P36 | IM     | OSCE (SP)                                                                                              | M57 |
| P37 | IM     | Student Self-Ratings of Communication Competence (VAS)                                                 | M58 |
| P38 | IM     | SP-PTT (part-task trainer) hybrid: OSCE                                                                | M59 |
| P38 | IM     | PTT (part-task trainer): OSCE                                                                          | M60 |
| P39 | RM     | Written reflective assignment                                                                          | M61 |
| P39 | RM     | Rating Scale - self assessment                                                                         | M62 |
| P40 | IM     | OSCE                                                                                                   | M63 |
| P40 | IM     | Doctors' Interpersonal Skills Questionnaire (DISQ)                                                     | M64 |
| P41 | IM     | OSCE Station (videotaped)                                                                              | M65 |
| P42 | RM     | Self-Assessment of Interpersonal Competence Questionnaire (SAICQ)                                      | M66 |
| P42 | RM     | The Staff-Patient Interaction Scale (SPIR)                                                             | M67 |
| P42 | RM     | Interpersonal Skills Rating Scale (ISRS) rated by SP's                                                 | M68 |

|     |        |                                                                                           |      |
|-----|--------|-------------------------------------------------------------------------------------------|------|
| P43 | RM     | Self efficacy rating (Likert scale)                                                       | M69  |
| P43 | IM     | SP clinical performance assessment by assessor direct observation (DO)                    | M70  |
| P44 | RM     | Self-reported preparedness (self efficacy) Likert questionnaire                           | M71  |
| P44 | IM     | SP observation using the Calgary-Cambridge Observation Guide (CCOG)                       | M72  |
| P45 | IM     | Radiological (X-ray) diagnostic accuracy                                                  | M73  |
| P45 | RM     | Diagnostic Confidence Rating (Likert scale)                                               | M74  |
| P46 | RM     | Diagnosis using written clinical vignettes on Qualtrics                                   | M75  |
| P46 | RM     | Chronometry                                                                               | M76  |
| P47 | IM (A) | mini-CEX                                                                                  | M77  |
| P48 | RM     | Computer-analyzed Electroencephalography                                                  | M78  |
| P48 | RM     | Pauli Test                                                                                | M79  |
| P49 | RM     | The Mini-NeuroCart                                                                        | M80  |
| P50 | RM     | Self efficacy scale                                                                       | M81  |
| P50 | RM     | Responses to a standardised video case                                                    | M82  |
| P51 | IM     | OSCE test - Global rating scale of communication skills - binary checklist                | M83  |
| P52 | RM     | Analogue Patient Satisfaction Questionnaire                                               | M84  |
| P53 | IM     | OSCE SP checklist                                                                         | M85  |
| P54 | IM     | SP case                                                                                   | M86  |
| P55 | IM     | Formative exit exam (medical school module) on clinical reasoning and diagnostic accuracy | M87  |
| P56 | IM     | SP's who rated students on a 5-point scale for communication skills                       | M88  |
| P56 | IM     | Diagnostic Thinking Inventory                                                             | M89  |
| P57 | IM     | Procedural Protocol Instrument (IPPI) Global rating scale - blind video assessed          | M90  |
| P58 | RM     | CanMEDS Assessment Framework Measure                                                      | M91  |
| P59 | RM     | The Oslo Inventory of Self-Reported Communication Skills (OSISCS)                         | M92  |
| P59 | IM     | SP - The Arizona Communication Interview Rating Scale (ACIR)                              | M93  |
| P60 | RM     | Coping Responses Inventory (Moos)                                                         | M94  |
| P60 | IM     | State Examination for Medical Doctors                                                     | M95  |
| P60 | RM     | Maslach Burnout Inventory (MBI)                                                           | M96  |
| P61 | IM     | CPX - Clinical Performance Examination (SP)                                               | M97  |
| P61 | IM     | OSCE                                                                                      | M98  |
| P62 | IM     | MRCGP (UK)                                                                                | M99  |
| P62 | IM     | MRCGP AKT (Applied Knowledge Test)                                                        | M100 |
| P63 | RM     | Self-evaluation meta-planning focus group                                                 | M101 |
| P64 | IM     | The Junior Doctor Assessment Tool (JDAT)                                                  | M102 |
| P65 | IM     | GMC test of Competence (ToC)                                                              | M103 |
| P65 | IM     | OSCE                                                                                      | M104 |
| P65 | RM     | Self-Assessment Questionnaire - ranking in comparison to other doctors                    | M105 |
| P66 | IM     | OSCE - using the Calgary-Cambridge Observation Guide Checklist (SP and observer)          | M106 |

|     |        |                                                                                            |      |
|-----|--------|--------------------------------------------------------------------------------------------|------|
| P66 | RM     | Self-assessment - Likert scale                                                             | M107 |
| P67 | RM     | Empathy and Clarity Rating Scale (ECRS) in OSCE evaluation                                 | M108 |
| P68 | RM     | Comfort and competence of working with sexual and gender minorities survey                 | M109 |
| P69 | IM (A) | Portfolio-based assessment                                                                 | M110 |
| P70 | RM     | Wechsler Adult Intelligence Scale (WAIS-IV)                                                | M111 |
| P71 | RM     | OSCE - Standardized nurse (SN) rating on professional collaboration                        | M112 |
| P72 | RM     | Focus groups                                                                               | M113 |
| P73 | IM     | OSCE - 4 stations (SP)                                                                     | M114 |
| P73 | RM     | 5-minute examination - Diagnostic Accuracy                                                 | M115 |
| P74 | RM     | The Essential Elements of Communication (EEC) - rating scale on an OSCE (SP)               | M116 |
| P75 | RM     | Socio-cultural domains of patient safety - OSCE (SP)                                       | M117 |
| P76 | RM     | Electronic 'Just in Time Medicine' (JIT) clinical evaluation exercise (CEX)                | M118 |
| P77 | IM     | Group Assessment using faculty opinion survey                                              | M119 |
| P78 | IM (A) | Assessor Rating Scale                                                                      | M120 |
| P79 | IM     | 360-degree feedback                                                                        | M121 |
| P80 | RM     | PRONE score                                                                                | M122 |
| P81 | RM     | PREP assessment (Physician Review Program) Test Battery                                    | M123 |
| P82 | RM     | Chart stimulated recall (CSR)                                                              | M124 |
| P82 | IM     | SP's who rated students on a 5-point scale for communication skills                        | M125 |
| P83 | IM     | Center for Personalized Education for Physicians (CPEP) multivariate competence assessment | M126 |
| P84 | RM     | Patient-physician Interaction Quality Checklist                                            | M127 |
| P85 | RM     | Team Objective Structured Bedside Assessment (TOSBA)                                       | M128 |
| P86 | IM     | GMC Test of Competence (ToC) - including a written knowledge test and an OSCE              | M129 |
| P87 | IM     | GMC Test of Competence (ToC) - including a written knowledge test and an OSCE              | M130 |
| P88 | RM     | Knowledge-based questionnaire                                                              | M131 |
| P89 | RM     | 360-degree Assessment                                                                      | M132 |
| P90 | IM     | OSCE (SP)                                                                                  | M133 |
| P91 | RM     | Emergency Medicine Milestones Survey                                                       | M134 |
| P92 | IM     | Vignettes                                                                                  | M135 |
| P92 | IM     | SP's                                                                                       | M136 |
| P92 | IM     | Chart abstraction                                                                          | M137 |
| P93 | IM     | Referral for fitness to practice investigation                                             | M138 |
| P94 | IM     | OSCE                                                                                       | M139 |
| P95 | RM     | The Jefferson Scale of Physician Empathy (JSE)                                             | M140 |
| P96 | RM     | The Scale of Attitudes Toward Disabled Persons (SADP)                                      | M141 |
| P97 | RM     | The Jefferson Scale of Physician Empathy (JSE)                                             | M142 |
| P98 | RM     | The Almost Perfect Scale-Revised (APS-R)                                                   | M143 |
| P98 | IM     | Grade Point Average (GPA)                                                                  | M144 |

|      |        |                                                                                                                                                                                                                   |      |
|------|--------|-------------------------------------------------------------------------------------------------------------------------------------------------------------------------------------------------------------------|------|
| P99  | RM     | The cross-cultural care survey (CCCS)                                                                                                                                                                             | M145 |
| P100 | IM     | Workplace Based Assessments (WPBA) including: mini-clinical evaluation exercise (mini-CEX), case-based discussion (CbD), direct observation of procedural skills (DOPS), and mini-peer assessment tool (mini-PAT) | M146 |
| P101 | IM (A) | Workplace Based Assessments (WBA's)                                                                                                                                                                               | M147 |
| P102 | IM     | OSCE                                                                                                                                                                                                              | M148 |
| P103 | RM     | Support vector machine combined with an ordinal partitioning model (SVMOP)                                                                                                                                        | M149 |
| P104 | RM     | Professional Fulfilment Index (PFI)                                                                                                                                                                               | M150 |
| P105 | RM     | Epworth Sleepiness Scale                                                                                                                                                                                          | M151 |
| P105 | RM     | QOL Burnout and depression                                                                                                                                                                                        | M152 |
| P105 | RM     | Self-reported medical errors                                                                                                                                                                                      | M153 |

*Notes.*

EM: Existing Measures, RM: Research Methods, (A): Assessor assessment.

Papers in the manuscript are referenced in the format <sup>P1,2,3,4,5 etc.</sup> individual measures are referred to as <sup>M1,2,3,4,5 etc.</sup>
